# Supplementary material for: Endoglin and MMP14 Contribute to Ewing Sarcoma Spreading by Modulation of Cell–Matrix Interactions
Source: MDPI journal article supplement (doi:10.3390/ijms23158657), 2022-08-04
Supplement: s1 [file s1]

| A ENG        |       | Primary  |                   |       | Post-CT  |                   |       | Metastasis |                   |       | Relapse  |                   |       |
|--------------|-------|----------|-------------------|-------|----------|-------------------|-------|------------|-------------------|-------|----------|-------------------|-------|
| Intensity    | Score | # scored | % total per group |       | # scored | % total per group |       | # scored   | % total per group |       | # scored | % total per group |       |
| Negative     | 0     | 1        | 2.86              | 22.86 | 6        | 26.09             | 60.87 | 0          | 0.00              | 31.25 | 1        | 12.50             | 37.50 |
| Low          | (0,1] | 7        | 20.00             |       | 8        | 34.78             |       | 5          | 31.25             |       | 2        | 25.00             |       |
| Intermediate | (1,2] | 17       | 48.57             | 71.14 | 6        | 26.09             | 39.13 | 9          | 56.25             | 68.75 | 2        | 25.00             | 62.50 |
| High         | (2,3] | 10       | 28.57             |       | 3        | 13.04             |       | 2          | 12.50             |       | 3        | 37.50             |       |
| Total        |       | 35       | 100               | 100   | 23       | 100               | 100   | 16         | 100               | 100   | 8        | 100               | 100   |

| B ENG        |       | Primary  |                   |       | Post-CT  |                   |       | Metastasis |                   |       | Relapse  |                   |       |
|--------------|-------|----------|-------------------|-------|----------|-------------------|-------|------------|-------------------|-------|----------|-------------------|-------|
| IxA          | Score | # scored | % total per group |       | # scored | % total per group |       | # scored   | % total per group |       | # scored | % total per group |       |
| Negative     | 0     | 1        | 2.86              | 28.57 | 6        | 26.09             | 65.22 | 1          | 6.25              | 31.25 | 1        | 12.50             | 37.50 |
| Low          | (0,3] | 9        | 25.71             |       | 9        | 39.13             |       | 4          | 25.00             |       | 2        | 25.00             |       |
| Intermediate | (3,6] | 17       | 48.57             | 71.43 | 5        | 21.74             | 34.78 | 9          | 56.25             | 68.75 | 2        | 25.00             | 62.50 |
| High         | (3,9] | 8        | 22.86             |       | 3        | 13.04             |       | 2          | 12.50             |       | 3        | 37.50             |       |
| Total        |       | 35       | 100               | 100   | 23       | 100               | 100   | 16         | 100               | 100   | 8        | 100               | 100   |

| C ENG        |       | # scored |             |         |             |            |             |
|--------------|-------|----------|-------------|---------|-------------|------------|-------------|
| Intensity    | Score | Primary  | % All total | Post-CT | % All total | Metastasis | % All total |
| Negative     | 0     | 1        | 9.8         | 6       | 17.1        | 0          | 6.1         |
| Low          | (0,1] | 7        |             | 8       |             | 5          |             |
| Intermediate | (1,2] | 17       | 32.9        | 6       | 11.0        | 9          | 13.4        |
| High         | (2,3] | 10       |             | 3       |             | 2          |             |
| Total        |       | 35       | 42.7        | 23      | 28.0        | 16         | 19.5        |
|              |       |          |             |         |             |            |             |

**Table S1. Distribution of ENG intensity in ES patients.** (A) Frequency of ENG intensity in IHC samples from ES patients. (B) Frequency of ENG intensity considering area of staining in IHC samples from ES patients. (C) Frequency of ENG intensity considering the frequency of each stage as part of a whole group.

| A MMP14      |       | Primary  |         |                   | Post-CT  |         |                   | Metastasis |         |                   | Relapse  |         |                   |
|--------------|-------|----------|---------|-------------------|----------|---------|-------------------|------------|---------|-------------------|----------|---------|-------------------|
| Intensity    | Score | # scored | % total | % total per group | # scored | % total | % total per group | # scored   | % total | % total per group | # scored | % total | % total per group |
| Negative     | 0     | 1        | 2,86    | 20.00             | 4        | 17.39   | 60.87             | 2          | 12.50   | 37.50             | 1        | 12.50   | 62.50             |
| Low          | (0,1] | 6        | 17.14   |                   | 10       | 43.48   |                   | 4          | 25.00   |                   | 4        | 50.00   |                   |
| Intermediate | (1,2] | 22       | 62.86   | 80.00             | 6        | 26.09   | 39.13             | 5          | 31.25   | 62.50             | 2        | 25.00   | 37.50             |
| High         | (2,3] | 6        | 17.14   |                   | 3        | 13.04   |                   | 5          | 31.25   |                   | 1        | 12.50   |                   |
| Total        |       | 35       | 100     | 100               | 23       | 100     | 100               | 16         | 100     | 100               | 8        | 100     | 100               |

| B MMP14      |       | Primary  |         |                   | Post-CT  |         |                   | Metastasis |         |                   | Relapse  |         |                   |
|--------------|-------|----------|---------|-------------------|----------|---------|-------------------|------------|---------|-------------------|----------|---------|-------------------|
| IxA          | Score | # scored | % total | % total per group | # scored | % total | % total per group | # scored   | % total | % total per group | # scored | % total | % total per group |
| Negative     | 0     | 1        | 2.86    | 22.86             | 5        | 21.74   | 65.22             | 2          | 12.50   | 43.75             | 1        | 12.50   | 62.50             |
| Low          | (0,3] | 7        | 20.00   |                   | 10       | 43.48   |                   | 5          | 31.25   |                   | 4        | 50.00   |                   |
| Intermediate | (3,6] | 21       | 60.00   | 77.14             | 5        | 21.74   | 34.78             | 4          | 25.00   | 56.25             | 2        | 25.00   | 37.50             |
| High         | (3,9] | 6        | 17.14   |                   | 3        | 13.04   |                   | 5          | 31.25   |                   | 1        | 12.50   |                   |
| Total        |       | 35       | 100     | 100               | 23       | 100     | 100               | 16         | 100     | 100               | 8        | 100     | 100               |

| C MMP14      |       | # scored |             |         |             |            |             |
|--------------|-------|----------|-------------|---------|-------------|------------|-------------|
| Intensity    | Score | Primary  | % All total | Post-CT | % All total | Metastasis | % All total |
| Negative     | 0     | 1        | 8.5         | 4       | 17.1        | 2          | 7.3         |
| Low          | (0,1] | 6        |             | 10      |             | 4          |             |
| Intermediate | (1,2] | 22       | 34.1        | 6       | 11.0        | 5          | 12.2        |
| High         | (2,3] | 6        |             | 3       |             | 5          |             |
| Total        |       | 35       | 42.7        | 23      | 28.0        | 16         | 19.5        |
|              |       |          |             |         |             | 8          | 9.8         |

**Table S2. Distribution of MMP14 intensity in ES patients.** (A) Frequency of MMP14 intensity in IHC samples from ES patients. (B) Frequency of MMP14 intensity considering area of staining in IHC samples from ES patients. (C) Frequency of MMP14 intensity considering the frequency of each stage as part of a whole group.

| shENG | Database<br>Molecular Signature | NES   | pvalue   | p.adjust | qvalues  |
|-------|---------------------------------|-------|----------|----------|----------|
| RM82  | GO_EXTRACELLULAR_MATRI          | -1,56 | 1,49E-03 | 1,32E-01 | 1,23E-01 |
| SKNMC | X                               | -2,10 | 2,04E-03 | 6,76E-02 | 6,08E-02 |
| RM82  | GO_REGULATION_OF_TRAN           | -1,45 | 1,49E-03 | 1,32E-01 | 1,23E-01 |
| SKNMC | S_MEMBRANE_TRANSPORT            | 1,34  | 1,58E-02 | 2,24E-01 | 2,01E-01 |
| RM82  | GO_SIDE_OF_MEMBRANE             | -1,46 | 1,51E-03 | 1,32E-01 | 1,23E-01 |
| SKNMC |                                 | -1,35 | 6,00E-03 | 1,40E-01 | 1,26E-01 |
| RM82  | GO_REGULATION_OF_TRAN           | -1,38 | 1,51E-03 | 1,32E-01 | 1,23E-01 |
| SKNMC | S_SYNAPTIC_SIGNALING            | -1,28 | 1,61E-02 | 2,24E-01 | 2,02E-01 |
| RM82  | GO_SYNAPTIC_MEMBRANE            | -1,53 | 1,51E-03 | 1,32E-01 | 1,23E-01 |
| SKNMC |                                 | -1,43 | 4,07E-03 | 1,10E-01 | 9,93E-02 |
| RM82  | BOQUEST_STEM_CELL_CUL           | -1,46 | 1,51E-03 | 1,32E-01 | 1,23E-01 |
| SKNMC | TURED_VS_FRESH_UP               | -1,33 | 1,20E-02 | 1,97E-01 | 1,77E-01 |
| RM82  | GO_EXTRACELLULAR_STRU           | -1,60 | 1,52E-03 | 1,32E-01 | 1,23E-01 |
| SKNMC | CTURE_ORGANIZATION              | -2,24 | 2,00E-03 | 6,76E-02 | 6,08E-02 |
| RM82  | GO_SYNAPSE_ORGANIZATIO          | -1,43 | 1,54E-03 | 1,32E-01 | 1,23E-01 |
| SKNMC | N                               | -1,78 | 2,04E-03 | 6,76E-02 | 6,08E-02 |
| RM82  | GO_CELL_SUBSTRATE_JUNC          | -1,57 | 1,54E-03 | 1,32E-01 | 1,23E-01 |
| SKNMC | TION                            | -1,52 | 2,06E-03 | 6,76E-02 | 6,08E-02 |
| RM82  | BOQUEST_STEM_CELL_UP            | -1,88 | 1,54E-03 | 1,32E-01 | 1,23E-01 |
| SKNMC |                                 | -2,06 | 2,05E-03 | 6,76E-02 | 6,08E-02 |

**Table S3.** GSEA from RM82- and SKNMC- shENG models.

| Cell line  | Database                              | NES   | p value  | p adjust | q value  |
|------------|---------------------------------------|-------|----------|----------|----------|
| shENG/pENG | Molecular Signature                   |       |          |          |          |
| RM82       | RIGGI_EWING_SARCOMA<br>_PROGENITOR_DN | -1,43 | 1,03E-02 | 2,52E-01 | 2,33E-01 |
| TC71       |                                       | 1,35  | 2,00E-02 | 1,43E-01 | 1,19E-01 |
| RM82       | GO_ACTOMYOSIN                         | -1,72 | 1,80E-03 | 1,88E-01 | 1,75E-01 |
| TC71       |                                       | 1,45  | 1,82E-02 | 1,33E-01 | 1,11E-01 |
| RM82       | GO_COLLAGEN_BINDING                   | -1,54 | 9,06E-03 | 2,45E-01 | 2,26E-01 |
| TC71       |                                       | 1,53  | 2,07E-02 | 1,45E-01 | 1,21E-01 |
| RM82       | GO_CELL_SUBSTRATE_A<br>DHESION        | -1,30 | 3,04E-02 | 3,53E-01 | 3,27E-01 |
| TC71       |                                       | 1,42  | 1,95E-03 | 3,15E-02 | 2,63E-02 |
| RM82       | GO_CELL_SUBSTRATE_J<br>UNCTION        | -1,66 | 1,58E-03 | 1,88E-01 | 1,75E-01 |
| TC71       |                                       | 1,72  | 1,93E-03 | 3,15E-02 | 2,63E-02 |
| RM82       | GO_CELL_LEADING_EDG<br>E              | -1,45 | 1,58E-03 | 1,88E-01 | 1,75E-01 |
| TC71       |                                       | 1,56  | 1,92E-03 | 3,15E-02 | 2,63E-02 |

**Table S4.** GSEA from RM82-shENG and TC71- pENG models.

| Subpathway_name                                  | log2(FC)  | Pvalue   | FDR      | UniprotKB_functions                                                                                                              |
|--------------------------------------------------|-----------|----------|----------|----------------------------------------------------------------------------------------------------------------------------------|
| Leukocyte transendothelial migration: PXN        | -2,03E-01 | 9,70E-07 | 2,42E-04 | Cell adhesion                                                                                                                    |
| Ras signaling pathway: MLLT4*                    | 1,50E-01  | 1,10E-06 | 2,42E-04 | Cell adhesion                                                                                                                    |
| Ras signaling pathway: MLLT4                     | 1,40E-01  | 1,71E-06 | 2,69E-04 | Cell adhesion                                                                                                                    |
| Sphingolipid signaling pathway: PRKCA            | -1,79E-01 | 1,70E-05 | 1,06E-03 | Apoptosis, Angiogenesis, Cell adhesion, Transcription regulation, Transcription, Adaptive immunity, Immunity, Biological rhythms |
| Tight junction: TJP1 CTNNB1 CTNNA1               | -4,60E-02 | 1,73E-05 | 1,06E-03 | Cell adhesion, Neurogenesis, Wnt signaling pathway, Transcription regulation, Transcription, Differentiation                     |
| Wnt signaling pathway: PRKCA                     | -1,66E-01 | 2,22E-05 | 1,29E-03 | Apoptosis, Angiogenesis, Cell adhesion, Transcription regulation, Transcription, Adaptive immunity, Immunity, Biological rhythms |
| Melanogenesis: PRKACA                            | -1,84E-01 | 3,11E-05 | 1,63E-03 | Angiogenesis, Cell adhesion, Apoptosis                                                                                           |
| Natural killer cell mediated cytotoxicity: PRKCA | -1,59E-01 | 7,74E-05 | 2,75E-03 | Apoptosis, Cell adhesion, Angiogenesis, Adaptive immunity, Immunity, Transcription regulation, Transcription, Biological rhythms |
| Retrograde endocannabinoid signaling: PRKCA      | -1,62E-01 | 7,78E-05 | 2,75E-03 | Apoptosis, Angiogenesis, Cell adhesion, Adaptive immunity, Transcription regulation, Transcription, Immunity, Biological rhythms |
| Cholinergic synapse: PRKCA                       | -1,62E-01 | 7,78E-05 | 2,75E-03 | Apoptosis, Angiogenesis, Cell adhesion, Transcription regulation, Transcription, Adaptive                                        |

| Subpathway_name                                                   | log2(FC)  | Pvalue   | FDR      | UniprotKB_functions                                                                                                              |
|-------------------------------------------------------------------|-----------|----------|----------|----------------------------------------------------------------------------------------------------------------------------------|
|                                                                   |           |          |          | immunity, Immunity, Biological rhythms                                                                                           |
| Serotonergic synapse: PRKCA                                       | -1,62E-01 | 7,78E-05 | 2,75E-03 | Apoptosis, Angiogenesis, Cell adhesion, Adaptive immunity, Transcription regulation, Transcription, Immunity, Biological rhythms |
| Insulin secretion: PRKCA                                          | -1,95E-01 | 8,64E-05 | 2,79E-03 | Angiogenesis, Apoptosis, Cell adhesion, Adaptive immunity, Immunity, Transcription regulation, Transcription, Biological rhythms |
| Circadian entrainment: PRKCA                                      | -1,71E-01 | 9,62E-05 | 2,86E-03 | Angiogenesis, Apoptosis, Cell adhesion, Adaptive immunity, Transcription regulation, Transcription, Immunity, Biological rhythms |
| Ras signaling pathway: PRKCA                                      | -2,20E-01 | 3,59E-04 | 6,69E-03 | Apoptosis, Angiogenesis, Cell adhesion, Adaptive immunity, Transcription regulation, Transcription, Immunity, Biological rhythms |
| Signaling pathways regulating pluripotency of stem cells: CTNNB1* | 4,53E-02  | 4,08E-04 | 6,69E-03 | Transcription regulation, Transcription, Neurogenesis, Wnt signaling pathway, Cell adhesion                                      |
| ErbB signaling pathway: PRKCA                                     | -2,36E-01 | 4,91E-04 | 7,82E-03 | Apoptosis, Angiogenesis, Cell adhesion, Adaptive immunity, Transcription regulation, Transcription, Immunity, Biological rhythms |
| cAMP signaling pathway: AFDN                                      | 3,36E-01  | 1,55E-03 | 2,03E-02 | Cell adhesion                                                                                                                    |



| Subpathway_name                                 | log2(FC)  | Pvalue   | FDR      | UniprotKB_functions                                                                                                                                                                                                          |
|-------------------------------------------------|-----------|----------|----------|------------------------------------------------------------------------------------------------------------------------------------------------------------------------------------------------------------------------------|
| Thyroid hormone signaling pathway: ATP1B4       | -8,51E-02 | 2,08E-03 | 2,51E-02 | Ion transport, Transcription regulation, Transcription, Transport, Sodium/potassium transport, Sodium transport, Potassium transport, Cell adhesion                                                                          |
| Leukocyte transendothelial migration: BCAR1     | -1,34E-01 | 3,54E-03 | 4,01E-02 | Cell adhesion                                                                                                                                                                                                                |
| Ras signaling pathway: PIK3R5*                  | -9,98E-02 | 4,52E-03 | 4,86E-02 | Angiogenesis, Endocytosis, Autophagy, Cell adhesion, Chemotaxis, Adaptive immunity, Inflammatory response, Innate immunity, Differentiation, Immunity, Stress response, Host-virus interaction, Protein transport, Transport |
| Progesterone-mediated oocyte maturation: PIK3R5 | -9,28E-02 | 4,63E-03 | 4,87E-02 | Angiogenesis, Endocytosis, Autophagy, Cell adhesion, Chemotaxis, Inflammatory response, Adaptive immunity, Innate immunity, Differentiation, Immunity, Stress response, Protein transport, Host-virus interaction, Transport |

**Table S5.** HiPathia analysis on RM82-shENG with shared cell adhesion UniprotKB function.

| <b>Antibody</b>                          | <b>Manufacturer</b>      | <b>Reference</b> |
|------------------------------------------|--------------------------|------------------|
| FAK1                                     | CST                      | 3285             |
| FAK1 P Y397                              | CST                      | 3283             |
| CamKII P Thr286                          | CST                      | 3361             |
| MEK1/2                                   | CST                      | 9122             |
| MEK1/2 P Ser217/221                      | CST                      | 9154             |
| PI3 Kinase p110-alpha                    | CST                      | 4249             |
| PKC (pan) P Ser660 (beta-2)              | CST                      | 9371             |
| PKC-zeta                                 | CST                      | 9372             |
| PKC-zeta/lambda P Thr410/403             | CST                      | 9378             |
| ErbB-1/EGFR                              | CST                      | 2232             |
| EGFR P Tyr1173                           | CST                      | 4407             |
| Akt P Thr308                             | CST                      | 2965             |
| Src                                      | CST                      | 2109             |
| Akt                                      | CST                      | 9272             |
| Akt P Ser473                             | CST                      | 4060             |
| beta-actin                               | CST                      | 4970             |
| E-Cadherin                               | CST                      | 3195             |
| beta-Catenin                             | CST                      | 9562             |
| beta-Catenin P Ser33,Ser37,Thr41         | CST                      | 9561             |
| beta-Catenin P Thr41,Ser45               | CST                      | 9565             |
| VEGFR P Tyr1175                          | CST                      | 2478             |
| PTEN                                     | CST                      | 9552             |
| PTEN P Ser380,Thr382,Thr383              | CST                      | 9554             |
| GSK-3-alpha/beta P Ser21/Ser9            | CST                      | 9331             |
| mTOR P Ser2448                           | CST                      | 2971             |
| PLC-gamma1 P Tyr783                      | CST                      | 2821             |
| Src (family) P Tyr416                    | CST                      | 2101             |
| Smad2/3 P<br>Ser465/Ser423,Ser467/Ser425 | CST                      | 8828             |
| Smad1/5 P Ser463/Ser465                  | CST                      | 9516             |
| EGFR P Tyr1086                           | Thermo Fisher Scientific | 36-9700          |
| GSK-3-beta P Ser9                        | CST                      | 9336             |
| GSK-3-beta                               | CST                      | 9315             |
| PKC-alpha                                | Beckton Dickinson        | 610108           |
| PLC-gamma1                               | CST                      | 2822             |
| VEGFR P Tyr951                           | CST                      | 4991             |
| VEGFR P Tyr1059                          | CST                      | 3817             |
| Calmodulin                               | Calbiochem               | NB12             |
| PDGFR P Tyr1021                          | CST                      | 2227             |
| PDGFR P Tyr751                           | CST                      | 4549             |
| Zyxin                                    | CST                      | 3553             |

| <b>Antibody</b>           | <b>Manufacturer</b> | <b>Reference</b> |
|---------------------------|---------------------|------------------|
| ILK1 (4G9)                | CST                 | 3856             |
| Akt P Ser473              | CST                 | 9271             |
| Akt P Thr308              | CST                 | 9275             |
| EGFR P Y992               | CST                 | 2235             |
| EGFR P Y1086              | CST                 | 2234             |
| mTOR (7C10)               | CST                 | 2983             |
| Integrin Beta 1 [EP1041Y] | Abcam               | ab52971          |
| mTOR P S2448 [EP2426(2)Y] | Abcam               | ab109268         |
| Smad2 (C86F7)             | CST                 | 3122             |
| Caveolin-1 (D46G3) XP R   | CST                 | 3267             |
| Integrin alpha 4          | CST                 | 4600             |
| Integrin beta3            | CST                 | 4702             |
| Integrin beta4            | CST                 | 4707             |
| Smad1 (D59D7)             | CST                 | 6944             |
| EphA2 (D4A2)              | CST                 | 6997             |
| beta-Tubulin              | Abcam               | ab6046           |
| PKC-alpha P Thr638        | Abcam               | ab32502          |
| GAPDH                     | Abcam               | ab9484           |
| PKC-gamma P Thr514        | GeneTex             | GTX25778         |
| mTOR P Ser2481            | Millipore (Upstate) | 09-343SP         |

**Table S6.** Antibodies used in RPPA.

| ID         | Description                                 | <i>sgMMP14</i> | NES   | pvalue   | p.adjust | qvalues  |
|------------|---------------------------------------------|----------------|-------|----------|----------|----------|
| GO:0000226 | microtubule cytoskeleton organization       | RM82           | -1,53 | 3,39E-03 | 1,33E-01 | 1,19E-01 |
|            |                                             | SKNMC          | -1,42 | 1,31E-03 | 1,78E-01 | 1,65E-01 |
| GO:0034333 | adherens junction assembly                  | RM82           | -1,43 | 2,70E-02 | 2,69E-01 | 2,41E-01 |
|            |                                             | SKNMC          | -1,83 | 1,64E-03 | 1,78E-01 | 1,65E-01 |
| GO:0051893 | regulation of focal adhesion assembly       | RM82           | -1,50 | 2,21E-02 | 2,46E-01 | 2,20E-01 |
|            |                                             | SKNMC          | -1,78 | 6,57E-03 | 2,46E-01 | 2,29E-01 |
| GO:0033627 | cell adhesion mediated by integrin          | RM82           | -1,49 | 2,43E-02 | 2,58E-01 | 2,32E-01 |
|            |                                             | SKNMC          | -1,66 | 8,20E-03 | 2,46E-01 | 2,29E-01 |
| GO:0031012 | extracellular matrix                        | RM82           | 1,61  | 1,40E-03 | 7,16E-02 | 6,27E-02 |
|            |                                             | SKNMC          | -2,11 | 1,29E-03 | 1,00E-01 | 8,92E-02 |
| GO:0030545 | receptor regulator activity                 | RM82           | 1,80  | 1,42E-03 | 1,26E-01 | 1,12E-01 |
|            |                                             | SKNMC          | -1,54 | 2,63E-03 | 2,73E-01 | 2,61E-01 |
| GO:0050840 | extracellular matrix binding                | RM82           | 1,83  | 1,69E-03 | 1,26E-01 | 1,12E-01 |
|            |                                             | SKNMC          | -1,70 | 8,67E-03 | 2,88E-01 | 2,75E-01 |
| GO:0070006 | metalloamino peptidase activity             | RM82           | -1,87 | 6,96E-03 | 1,62E-01 | 1,45E-01 |
|            |                                             | SKNMC          | -1,70 | 1,84E-02 | 3,66E-01 | 3,49E-01 |
| GO:0005201 | extracellular matrix structural constituent | RM82           | 1,49  | 9,58E-03 | 1,75E-01 | 1,56E-01 |
|            |                                             | SKNMC          | -2,13 | 1,52E-03 | 2,73E-01 | 2,61E-01 |
| WP3888     | VEGFA-VEGFR2 Signaling                      | RM82           | -1,35 | 1,45E-02 | 1,83E-01 | 1,64E-01 |
|            |                                             | SKNMC          | -1,41 | 5,19E-03 | 1,80E-01 | 1,68E-01 |

**Table S7.** GSEA from RM82- and SKNMC-*sgMMP14* models

| Gene name           | Protein name                                     | ENG / IgG       |                 |
|---------------------|--------------------------------------------------|-----------------|-----------------|
|                     |                                                  | LFQ Ratio       | p-value         |
| <b>ACTR1A</b>       | Alpha-centractin                                 | 1,00E+08        | <b>3,66E-03</b> |
| <b>ILKAP</b>        | Integrin-linked kinase-associated                | 3,70E+07        | <b>7,66E-06</b> |
|                     | serine/threonine phosphatase 2C                  |                 |                 |
| <b>APOF</b>         | Apolipoprotein F                                 | 1,50E+07        | <b>2,44E-02</b> |
| <b>DCTN3</b>        | Dynactin subunit 3                               | 1,20E+07        | <b>1,98E-02</b> |
| <b>DCTN4</b>        | Dynactin subunit 4                               | 8,50E+06        | <b>2,21E-03</b> |
| <b>PGAM5</b>        | Serine/threonine-protein phosphatase PGAM5,      | 7,90E+06        | <b>4,93E-03</b> |
|                     | mitochondrial                                    |                 |                 |
| <b>PPIL1</b>        | Peptidyl-prolyl cis-trans isomerase-like 1       | 7,50E+06        | <b>3,45E-02</b> |
| <b>ADORA3</b>       | Adenosine receptor A3                            | 3,00E+06        | <b>2,67E-02</b> |
| <b>sep-09</b>       | Septin-9                                         | 2,70E+06        | <b>2,20E-04</b> |
| <b>VRK1</b>         | Serine/threonine-protein kinase VRK1             | 9,60E+05        | <b>3,27E-02</b> |
| <b>CEP290</b>       | Centrosomal protein of 290 kDa                   | 9,30E+03        | <b>2,28E-02</b> |
| <b>ENG</b>          | <b>Endoglin</b>                                  | <b>3,20E+02</b> | <b>6,13E-03</b> |
| <b>IQCB1</b>        | IQ calmodulin-binding motif-containing protein 1 | 8,80E+01        | <b>2,20E-02</b> |
| <b>SORBS2</b>       | Sorbin and SH3 domain-containing protein 2       | 4,20E+01        | <b>2,64E-05</b> |
| <b>CALM3</b>        | Calmodulin-3                                     | 3,00E+01        | <b>7,23E-03</b> |
| <b>COL1A1</b>       | Collagen alpha-1(I) chain                        | 2,10E+01        | <b>2,78E-02</b> |
| <b>CRABP1</b>       | Cellular retinoic acid-binding protein 1         | 1,90E+01        | <b>1,22E-04</b> |
| <b>DCTN2</b>        | Dynactin subunit 2                               | 1,70E+01        | <b>1,57E-03</b> |
| <b>IGKV3OR2-268</b> | Ig kappa chain V-III region POM                  | 8,60E+00        | <b>7,41E-05</b> |
| <b>IARS</b>         | Isoleucine--tRNA ligase, cytoplasmic             | 5,30E+00        | <b>1,40E-02</b> |
| <b>PLAA</b>         | Phospholipase A-2-activating protein             | 5,20E+00        | <b>1,98E-02</b> |

**Table S8. Table depicting the most enriched ENG -interactors identified by IP/MS.** LFQ ratios ENG/IgG and associated  $p$ -values are shown. Herein, three biological replicates were used for each individual experiment. Statistical analysis was performed by paired two-tailed Student's  $t$ -test.
