# Supplementary material for: Endoglin and MMP14 Contribute to Ewing Sarcoma Spreading by Modulation of Cell–Matrix Interactions
Source: Int J Mol Sci. 2022 Aug 4;23(15):8657. doi: 10.3390/ijms23158657 (PMC9369355; doi:10.3390/ijms23158657)
Supplement: Supplementary file 1 [file ijms-23-08657-s001.zip]

Archive with 19 entries (19 files):
- Figure S1.png
- Figure S10.png
- Figure S11.png
- Figure S12.png
- Figure S13.png
- Figure S14.png
- Figure S15.png
- Figure S16.png
- Figure S17.png
- Figure S2.png
- Figure S3.png
- Figure S4.png
- Figure S5.png
- Figure S6.png
- Figure S7.png
- Figure S8.png
- Figure S9.png
- ijms-1756018-supplementary.pdf
- Tables S1-S8.pdf
